# Supplementary material for: Determination of content analysis of Achillea arabica Kotschy. plant flower ethanolic extract by LC-MS/MS and NMR and revealing the curative effects of the extract in diabetic rats
Source: Research Square preprint supplement (doi:10.21203/rs.3.rs-1207243/v1), 2022-01-17
Supplement: Supplementary file 1 [file 762f4a2455711aa86c1e1058.docx]

**Highlights**

1. According to LC–MS/MS results of *A. arabica* flower extract, quinic acid, cyranoside, chlorogenic acid and cosmosin were determined as major compounds.
2. Two new compounds were determined in this plant according to NMR analyzes and these compounds were named edremitine and achillosine, respectively.
3. The *Achillea arabica* flower extract regulated the levels of glucose, biochemical and antioxidant parameters.
4. The *Achillea arabica* flower extract might have pharmaceutical-nutritional potential.
